# Supplementary material for: Host–guest and network structures of some tetraphenylmethane derivatives
Source: Royal Society of Chemistry journal article supplement (doi:10.1039/b403858b), 2004-01-01
Supplement: supp.doc [file supp.doc]

*for CrystEngComm*

Host-guest and network structures of some tetraphenylmethane derivatives

**Srinivas Basavoju, Srinivasulu Aitipamula,****Gautam R. Desiraju***

*School of Chemistry, University of Hyderabad, Hyderabad 500 046, India.*

*E-mail: desiraju@uohyd.ernet.in*

**Supplementary Information**

(3 pages)

(Atom-labelling schemes of the compounds in this study, details of structure solution and refinement for (TCTPM).(MeCN)0.5)

| **DNTPM** | **(DNTPM)3.(H2O)2** |
| --- | --- |
| **(DNTPM).(THF)** | **TCTPM** |
| **(TCTPM).(MeCN)0.5 (before SQUEEZE)** | **(TCTPM).(MeCN)0.5 (after SQUEEZE)** |

ORTEP diagrams of the compounds in this study. Displacement ellipsoids are drawn at the 50% probability level for non-H atoms.

**Structure solution and refinement details for (TCTPM).(MeCN)0.5:**

The structure was solved by direct methods (SHELXS97). The disordered solvent molecules (located in the voids of the channels of the lattice) were incorporated in the model with the PLATON/SQUEEZE procedure (P. V. Sluis and A. L. Spek, *Acta Crystallogr.,* *Sect. A*, 1990, **46**, 194). This shows a smooth convergence of the Squeeze interation with a significant improvement of R-value. The residual agreement factor for all data before SQUEEZE are R1 = 0.0925, wR2 = 0.2372, and after R1 = 0.0687, wR2 = 0.1550. Additionally, the number of residual electrons (18, which is half of electrons in MeCN) reported to be found in a void is close to that expected for the assumed MeCN solvent. The final formulation of the compound, in agreement with the residual volume is (TCTPM).(MeCN)0.5.
